# Supplementary material for: Mild and facile synthesis of formamide: reduction and functionalization of CO2 using NaBH(OAc)3 under atmospheric pressure
Source: Royal Society of Chemistry journal article supplement (doi:10.1039/c9gc01137d), 2019-01-01

# Mild and facile synthesis of Formamide: Reduction and functionalization of CO<sub>2</sub> using NaBH(OAc)<sub>3</sub> under atmospheric pressure

Huan Liu,<sup>a</sup> Zhuang Nie,<sup>a</sup> Jiaan Shao,<sup>b</sup> Wenteng Chen,<sup>a,\*</sup> Yongping Yu <sup>a,\*</sup>

<sup>a</sup> College of Pharmaceutical Science, Zhejiang University, Hangzhou, 310058, P.R. China.

<sup>b</sup> Zhejiang University City College, Hangzhou, 310015, P.R. China.

## Supporting Information

|                                                |        |
|------------------------------------------------|--------|
| General information.....                       | S2     |
| General procedure for N-formylated amines..... | S2     |
| Compound characterization.....                 | S2-S6  |
| NMR spectra of final product.....              | S7-S15 |

## General information

Purification of reaction products were carried out by chromatography using silica gel (200 - 300 mesh). Melting points were recorded on a BüCHI B-540 melting point apparatus. NMR spectra were recorded for  $^1\text{H}$  NMR at 500 MHz. For  $^1\text{H}$  NMR, tetramethylsilane (TMS) served as internal standard ( $\delta = 0$ ) and data are reported as follows: chemical shift, multiplicity (s = singlet, d = doublet, t = triplet, q = quartet, m = multiplet, br=broad), coupling constant in Hz and integration. HRMS data were obtained on an Agilent 1290 HPLC-6224 Time of Flight Mass Spectrometer. Unless otherwise noted, all reagents were obtained commercially and used without further purification.

## General procedure for preparing N-formylated amines

Amine (1 mmol, 1.0 equiv.) was dissolved in 6 mL acetonitrile along with 0.64 g  $\text{NaBH}(\text{OAc})_3$  (3 mmol, 3.0 equiv.). The reaction mixture was then stirred at 50 °C under an atmosphere of  $\text{CO}_2$  (99.999%) for 5 hours. After cooling the system to room temperature, the  $\text{CH}_3\text{CN}$  was removed under reduced pressure and the residue was extracted with 10 mL ethyl acetate twice. Then the solution was concentrated and purified by silica gel column chromatography (PE/EA).

## Compound characterization

**N-benzylformamide:** CAS registry No. 6343-54-0

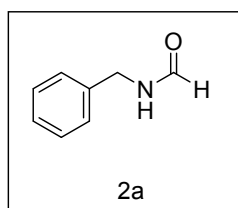

White solid; mp: 55.4~57.0 °C;  $^1\text{H}$  NMR (500 MHz,  $\text{CDCl}_3$ )  $\delta$  8.27 (s, 1H), 7.37-7.28 (m, 5H), 5.84 (s, 1H), 4.49 (d,  $J = 5.5$  Hz, 2H). HRMS (ESI):  $m/z$  calcd for  $\text{C}_8\text{H}_9\text{NO}$   $[\text{M}+\text{H}]^+$ : 136.0757, found: 136.0761

**N-phenethylformamide:** CAS registry No. 23069-99-0

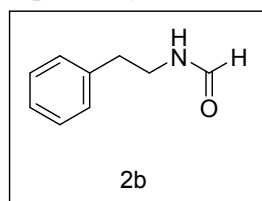

Yellow oil;  $^1\text{H}$  NMR (500 MHz,  $\text{DMSO-d}_6$ )  $\delta$  8.06 (s, 1H), 7.99 (s, 1H), 7.32-7.26 (m, 2H), 7.23-7.19 (m, 1H), 3.32 (q,  $J = 6.5$  Hz, 2H), 2.72 (t,  $J = 7.5$  Hz, 2H). HRMS (ESI):  $m/z$  calcd for  $\text{C}_9\text{H}_{11}\text{NO}$   $[\text{M}+\text{H}]^+$ : 150.0913, found: 150.0918

**morpholine-4-carbaldehyde:** CAS registry No. 4394-85-8

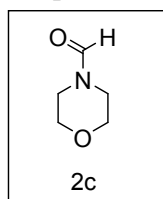

Colorless liquid;  $^1\text{H}$  NMR (500 MHz,  $\text{CDCl}_3$ )  $\delta$  8.04 (s, 1H), 3.68 (t,  $J = 5.0$  Hz, 2H), 3.65 (t,  $J =$

5.0 Hz, 2H), 3.56 (t,  $J = 5.0$  Hz, 2H), 3.39 (t,  $J = 5.0$  Hz, 2H). HRMS (ESI):  $m/z$  calcd for  $C_5H_9NO_2$   $[M+H]^+$ : 116.0706, found: 116.0709

**N-phenylformamide:** CAS registry No. 103-70-8

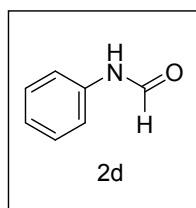

Light yellow oil;  $^1H$  NMR (500 MHz,  $CDCl_3$ ) (trans/cis=1/1)  $\delta$  8.79 (s, 1H), 8.70 (d,  $J = 11.5$  Hz, 1H), 8.36 (d,  $J = 2.0$  Hz, 1H), 7.78 (s, 1H), 7.58-7.52 (m, 2H), 7.40 – 7.30 (m, 5H), 7.21-7.17 (m, 1H), 7.16-7.09 (m, 4H). HRMS (ESI):  $m/z$  calcd for  $C_7H_7NO$   $[M+H]^+$ : 122.0600, found: 122.0603

**N-methyl-N-phenylformamide:** CAS registry No. 93-61-8

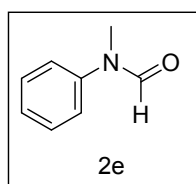

Yellow oil;  $^1H$  NMR (500 MHz,  $CDCl_3$ )  $\delta$  8.47 (s, 1H), 7.41 (t,  $J = 7.5$  Hz, 2H), 7.28 (t,  $J = 7.5$  Hz, 1H), 7.17 (d,  $J = 7.5$  Hz, 2H), 3.32 (s, 3H). HRMS (ESI):  $m/z$  calcd for  $C_8H_9NO$   $[M+H]^+$ : 136.0757, found: 136.0767

**N-o-tolylformamide:** CAS registry No. 94-69-9

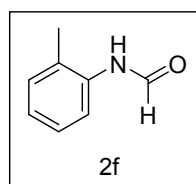

White solid; mp: 67.4~69.0 °C;  $^1H$  NMR (500 MHz,  $DMSO-d_6$ ) (trans/cis=2/5)  $\delta$  9.67 (d,  $J = 11.0$  Hz, 0.4H), 9.51 (s, 1H), 8.41 (d,  $J = 11.0$  Hz, 0.4 H), 8.29 (d,  $J = 2.0$  Hz, 1H), 7.73 (d,  $J = 10.0$  Hz, 1H), 7.24-7.02 (m, 5H), 2.24 (s, 1.2H), 2.22 (s, 3H). HRMS (ESI):  $m/z$  calcd for  $C_8H_9NO$   $[M+H]^+$ : 136.0757, found: 136.0760

**N-p-tolylformamide:** CAS registry No. 3085-54-9

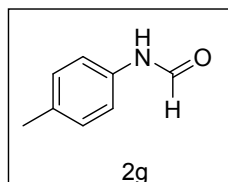

Brown solid; mp: 56.4~58.0 °C;  $^1H$  NMR (500 MHz,  $CDCl_3$ ) (trans/cis=6/5)  $\delta$  8.62 (d,  $J = 11.5$  Hz, 1H), 8.34 (d,  $J = 2.0$  Hz, 1H), 8.20 (s, 1H), 7.42 (d,  $J = 8.0$  Hz, 2H), 7.18-7.11 (m, 4H), 6.98 (d,  $J = 8.0$  Hz, 2H), 2.33 (s, 3H), 2.32 (s, 2.5H). HRMS (ESI):  $m/z$  calcd for  $C_8H_9NO$   $[M+H]^+$ : 136.0757, found: 136.0756

**N-m-tolylformamide:** CAS registry No. 3085-53-8

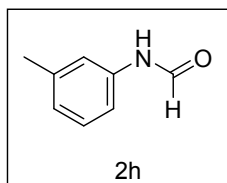

Yellow oil;  $^1\text{H NMR}$  (500 MHz,  $\text{DMSO-d}_6$ ) (trans/cis=2/5)  $\delta$  10.04 (s, 1.4H), 8.76 (d,  $J = 11.0$  Hz, 0.4H), 8.25 (d,  $J = 2.0$  Hz, 1H), 7.41 (s, 1H), 7.39-7.35 (m, 1H), 7.19 (t,  $J = 8.0$  Hz, 1.5H), 7.02-6.96 (m, 0.8H), 6.91-6.86 (m, 1.4H), 2.27 (s, 4.3H). HRMS (ESI):  $m/z$  calcd for  $\text{C}_8\text{H}_9\text{NO}$   $[\text{M}+\text{H}]^+$ : 136.0757, found: 136.0764

**N-(4-methoxyphenyl)formamide:** CAS registry No. 5470-34-8

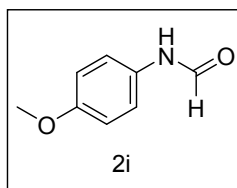

Yellow solid; mp: 81.2~82.5  $^\circ\text{C}$ ;  $^1\text{H NMR}$  (500 MHz,  $\text{CDCl}_3$ ) (trans/cis=1/1)  $\delta$  8.50 (d,  $J = 11.5$  Hz, 1H), 8.32 (s, 1H), 8.20-7.83 (br, 1H), 7.44 (d,  $J = 9.0$  Hz, 2H), 7.03 (d,  $J = 9.0$  Hz, 2H), 6.92 – 6.83 (m, 4H), 3.80 (s, 3H), 3.79 (s, 3H). HRMS (ESI):  $m/z$  calcd for  $\text{C}_8\text{H}_9\text{NO}_2$   $[\text{M}+\text{H}]^+$ : 152.0706, found: 152.0707

**N-(4-hydroxyphenyl)formamide:** CAS registry No. 1693-39-6

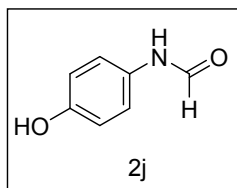

Brown solid; mp: 134.7-136.4  $^\circ\text{C}$ ;  $^1\text{H NMR}$  (500 MHz,  $\text{DMSO-d}_6$ ) (trans/cis=1/3)  $\delta$  9.90 (s, 0.75H), 9.84 (d,  $J = 11.5$  Hz, 0.25H), 9.24 (s, 1H), 8.50 (d,  $J = 11.0$  Hz, 0.25H), 8.34 (s, 0.39H), 8.15 (d,  $J = 2.0$  Hz, 0.77H), 7.43-7.25 (m, 1.5H), 7.02-6.93 (m, 0.5H), 6.76-6.64 (m, 2H), 6.52-6.35 (m, 2H). HRMS (ESI):  $m/z$  calcd for  $\text{C}_7\text{H}_7\text{NO}_2$   $[\text{M}+\text{H}]^+$ : 138.0550, found: 138.0554

**N-(4-fluorophenyl)formamide:** CAS registry No. 459-25-6

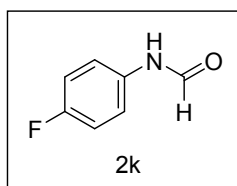

Brown solid; mp: 67.2-69.0  $^\circ\text{C}$ ;  $^1\text{H NMR}$  (500 MHz,  $\text{CDCl}_3$ ) (trans/cis=9/10)  $\delta$  8.56 (d,  $J = 11.5$  Hz, 0.9H), 8.48 (br, 0.7H), 8.35 (d,  $J = 2.0$  Hz, 1H), 7.55-7.47 (m, 2.1H), 7.43 (br, 0.9H), 7.10-6.97 (m, 5.3H). HRMS (ESI):  $m/z$  calcd for  $\text{C}_7\text{H}_6\text{FNO}$   $[\text{M}+\text{H}]^+$ : 140.0506, found: 140.0504

**N-(4-chlorophenyl)formamide:** CAS registry No. 2617-79-0

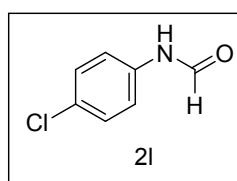

White solid; mp: 102.4~103.8 °C; <sup>1</sup>H NMR (500 MHz, CDCl<sub>3</sub>) (trans/cis=4/5) δ 8.65 (d, *J* = 11.0 Hz, 0.8H), 8.60 (s, 1H), 8.36 (br, 0.6H), 7.64 (br, 0.9H), 7.49 (d, *J* = 6.5 Hz, 2H), 7.34-7.25 (m, 3.6H), 7.04 (d, *J* = 8.5 Hz, 1.4H). HRMS (ESI): *m/z* calcd for C<sub>7</sub>H<sub>6</sub>ClNO [M+H]<sup>+</sup>: 156.0211, found: 156.0214

**N-(3-bromophenyl)formamide:** CAS registry No. 37831-25-7

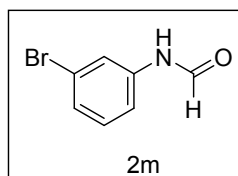

Yellow oil; <sup>1</sup>H NMR (500 MHz, DMSO-*d*<sub>6</sub>) (trans/cis=1/1) δ 10.32 (s, 1H), 10.19 (d, *J* = 11.0 Hz, 0.3H), 8.83 (d, *J* = 11.0 Hz, 0.3H), 8.30 (d, *J* = 2.0 Hz, 1H), 7.93 (t, *J* = 2.0 Hz, 1H), 7.49 (dt, *J* = 7.5, 2.0 Hz, 1H), 7.43 (s, 0.3H), 7.30-7.19 (m, 3H). HRMS (ESI): *m/z* calcd for C<sub>7</sub>H<sub>6</sub>BrNO [M+H]<sup>+</sup>: 199.9706, found: 199.9695

**N-(naphthalen-1-yl)formamide:** CAS registry No. 6330-51-4

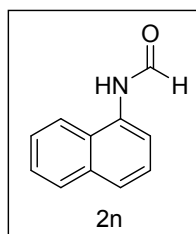

White solid; mp: 135.4~136.0 °C; <sup>1</sup>H NMR (500 MHz, DMSO-*d*<sub>6</sub>) (trans/cis=1/2) δ 10.50 (d, *J* = 10.5 Hz, 0.5H), 10.32 (s, 1H), 8.59 (d, *J* = 10.5 Hz, 0.5H), 8.49 (d, *J* = 2.0 Hz, 1H), 8.17-8.09 (m, 1.5H), 8.01 (d, *J* = 8.0 Hz, 1H), 7.97-7.92 (m, 1.5H), 7.80 (d, *J* = 8.5 Hz, 0.5H), 7.74 (d, *J* = 8.5 Hz, 1H), 7.61-7.53 (m, 3H), 7.52-7.47 (m, 1.5H), 7.41 (d, *J* = 7.0 Hz, 0.5H). HRMS (ESI): *m/z* calcd for C<sub>11</sub>H<sub>9</sub>NO [M+H]<sup>+</sup>: 172.0757, found: 172.0761

**N-(pyridin-2-yl)formamide:** CAS registry No. 34813-97-3

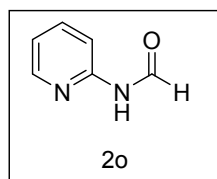

White solid; mp: 72.4~73.0 °C; <sup>1</sup>H NMR (500 MHz, DMSO-*d*<sub>6</sub>) (trans/cis=9/2) δ 10.59 (s, 1.8H), 10.46 (s, 0.4H), 9.28 (d, *J* = 10.0 Hz, 1H), 8.36-8.21 (m, 2.7H), 8.06 (d, *J* = 8.5 Hz, 1H), 7.85-7.64 (m, 2H), 7.16-6.97 (m, 2H), 6.92 (d, *J* = 8.5 Hz, 1H). HRMS (ESI): *m/z* calcd for C<sub>6</sub>H<sub>6</sub>N<sub>2</sub>O [M+H]<sup>+</sup>: 123.0553, found: 123.0558

**N-(4-nitrophenyl)formamide:** CAS registry No. 16135-31-2

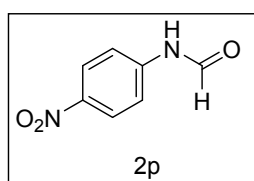

Yellow solid; mp: 194.4~196.0 °C; <sup>1</sup>H NMR (500 MHz, DMSO-*d*<sub>6</sub>) (trans/cis=3/1) δ 10.81 (s, 1H), 10.70 (d, *J* = 10.0 Hz, 0.3H), 9.05 (d, *J* = 10.3 Hz, 0.3H), 8.40 (s, 1H), 8.27-8.15 (m, 2.66H), 7.82

(d,  $J = 9.0$  Hz, 2H), 7.42 (d,  $J = 9.0$  Hz, 0.6H). HRMS (ESI):  $m/z$  calcd for  $C_7H_6N_2O_3$   $[M+H]^+$ : 167.0451, found: 167.0447

**N-(3-ethynylphenyl)formamide**: CAS registry No. 1364394-80-8

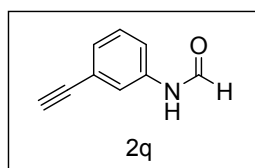

White solid; mp: 232.4~233.0 °C;  $^1H$  NMR (500 MHz,  $CDCl_3$ ) (trans/cis=1/1)  $\delta$  8.72-8.68 (m, 1H), 8.37 (d,  $J = 2.0$  Hz, 1H), 7.67 (s, 1H), 7.59-7.53 (m, 1H), 7.33-7.27 (m, 3H), 7.25-7.22 (m, 2H), 7.12-7.05 (m, 1H), 3.12 (s, 1H), 3.08 (s, 1H). HRMS (ESI):  $m/z$  calcd for  $C_9H_7NO$   $[M+H]^+$ : 146.0600, found: 146.0605

**N-formylbenzamide**: CAS registry No. 4252-31-7

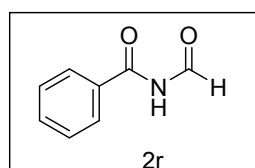

White solid; mp: 112.4~113.8 °C;  $^1H$  NMR (500 MHz,  $DMSO-d_6$ )  $\delta$  11.75 (s, 1H), 9.26 (s, 1H), 8.04-7.98 (m, 2H), 7.70-7.65 (m, 1H), 7.57-7.52 (m, 2H). HRMS (ESI):  $m/z$  calcd for  $C_8H_7NO_2$   $[M+H]^+$ : 150.0550, found: 150.0550

# NMR spectra of final compounds

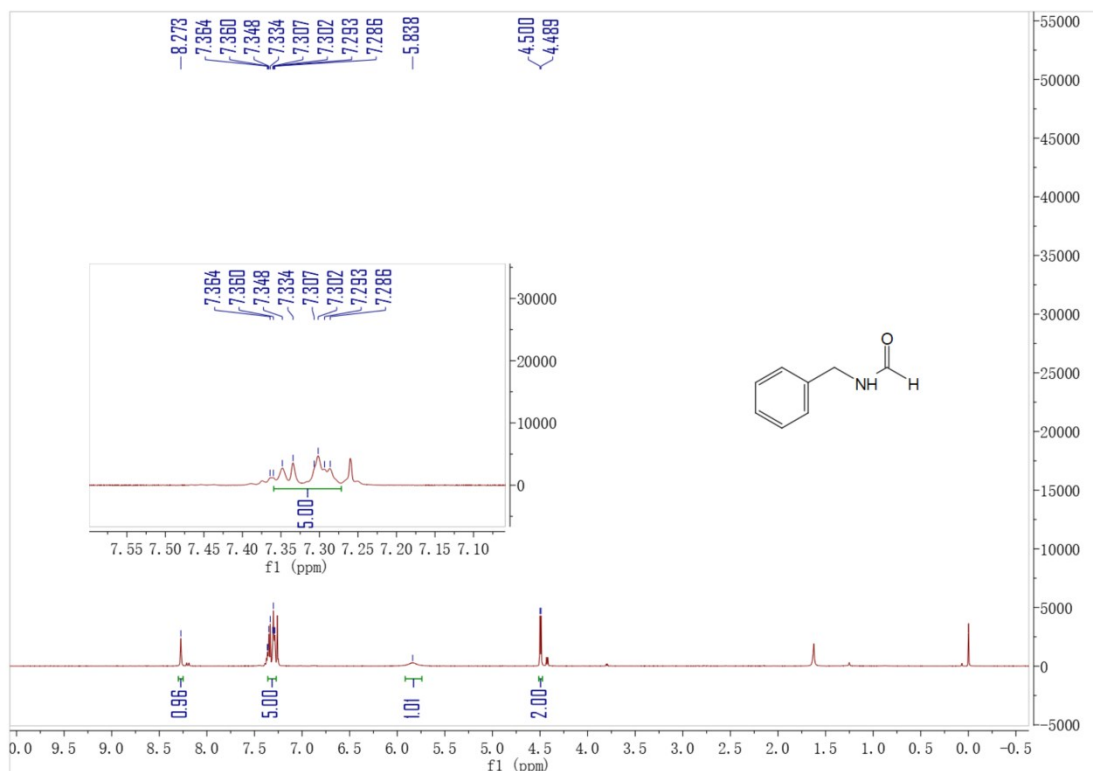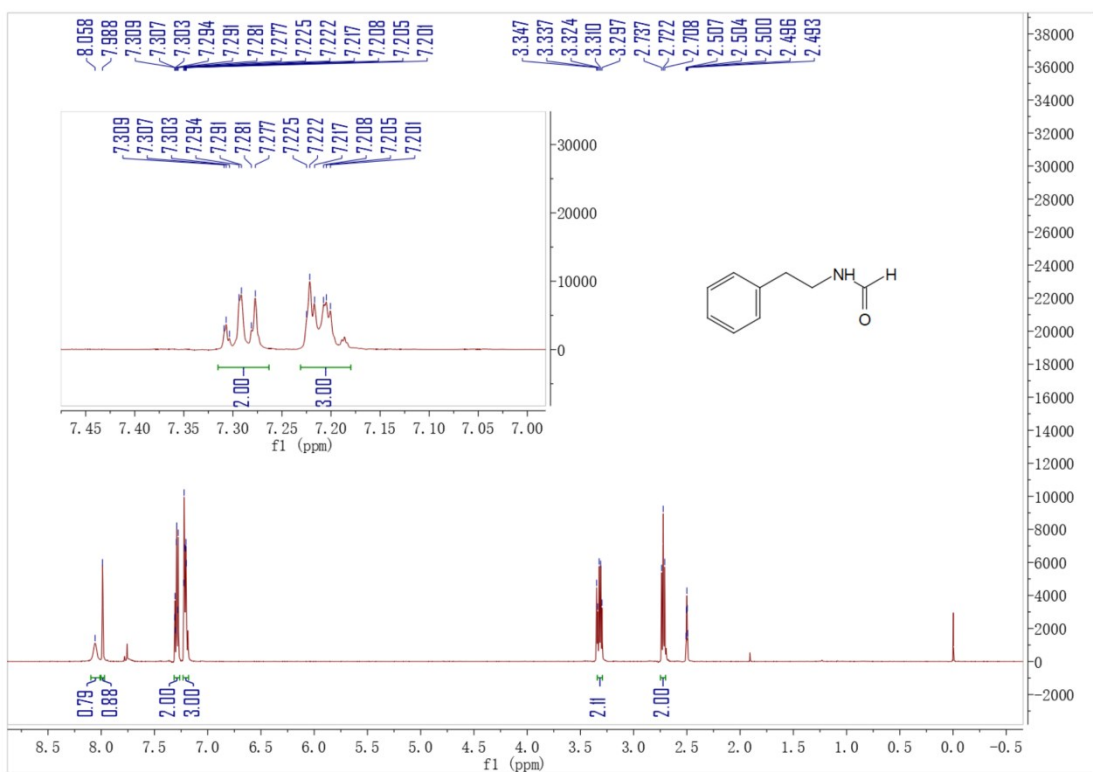

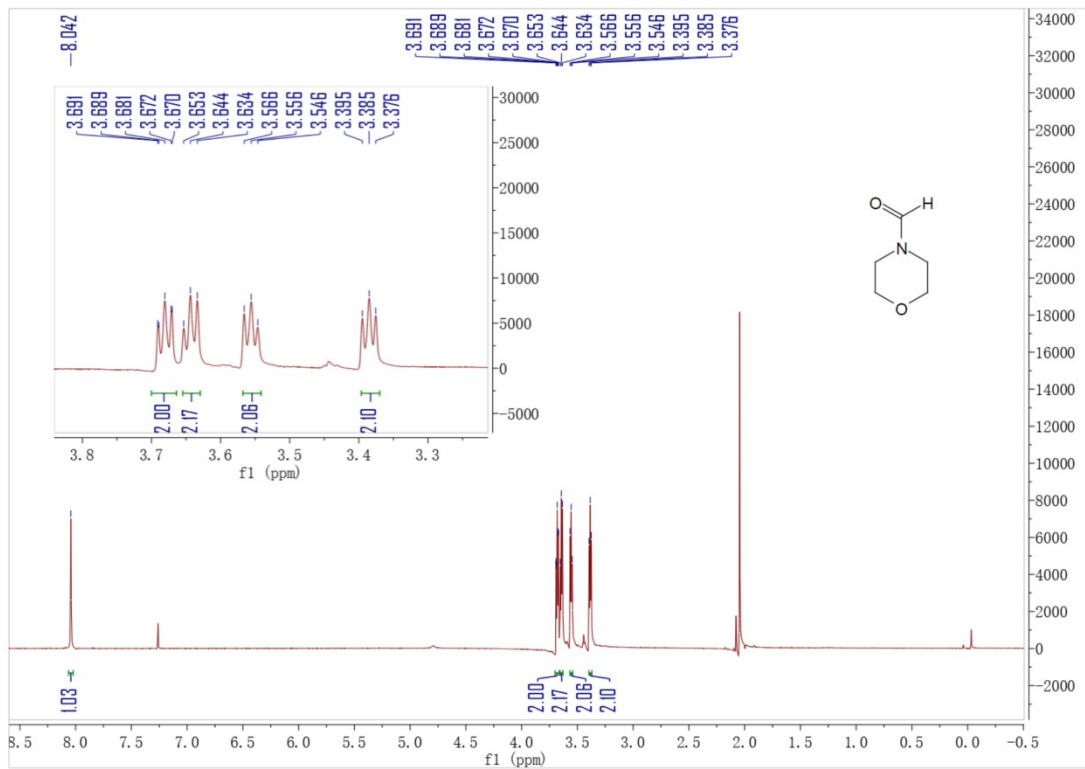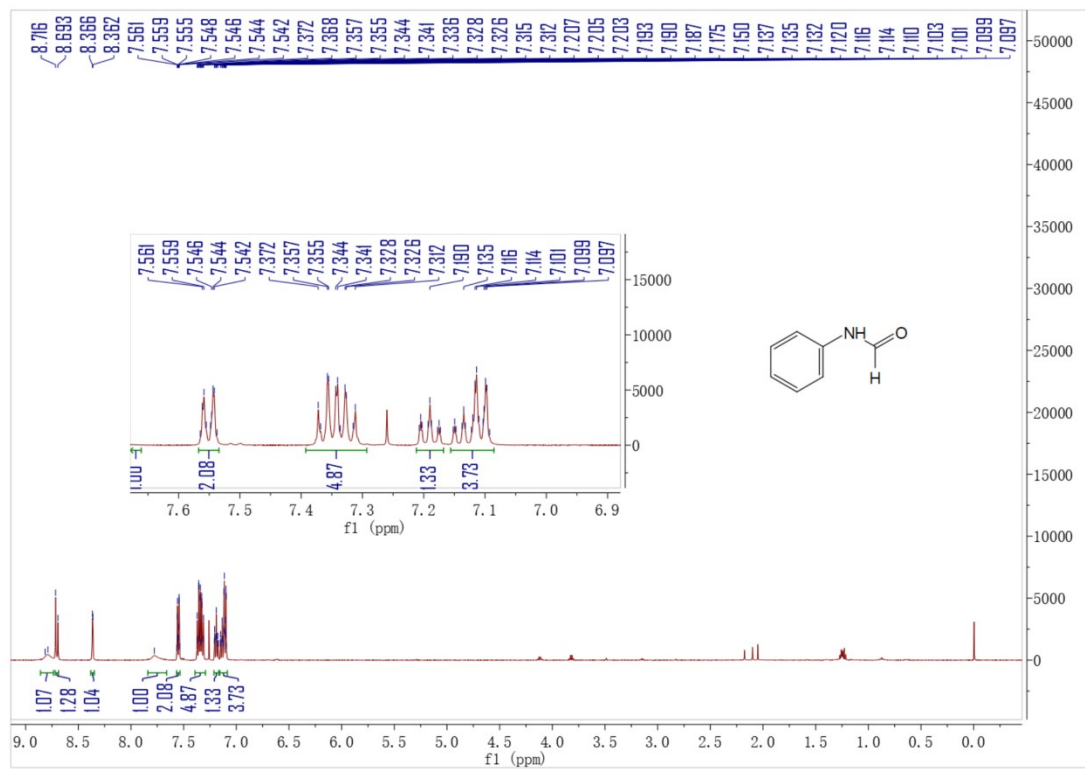



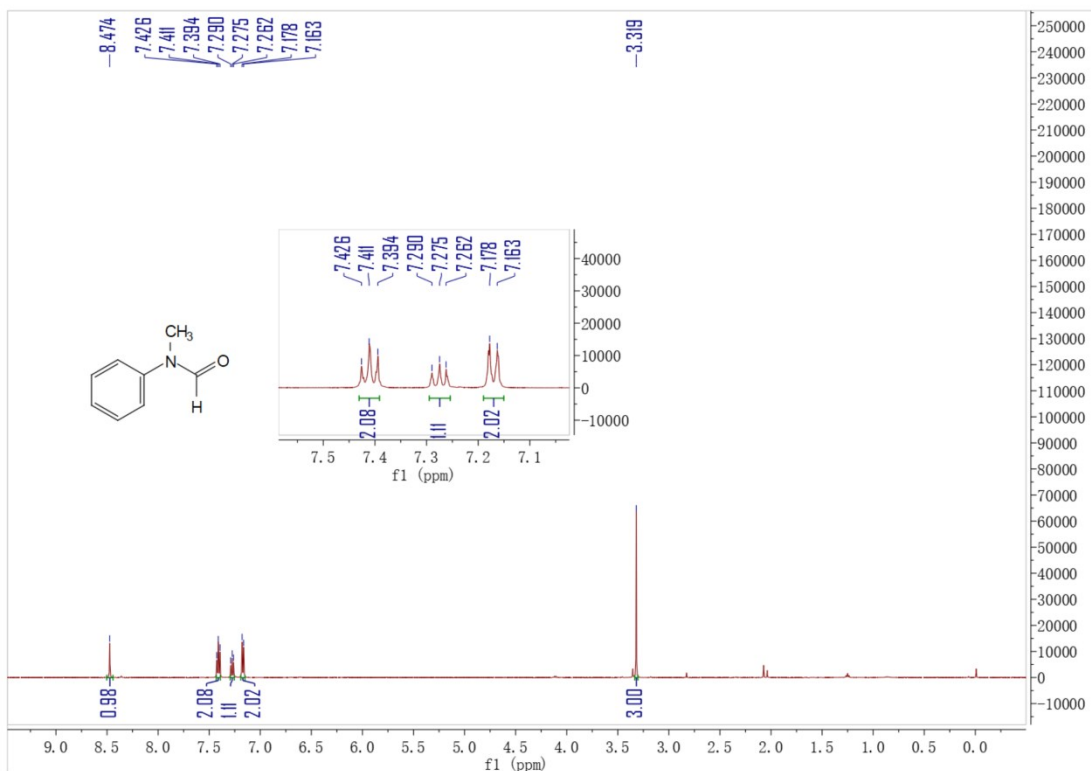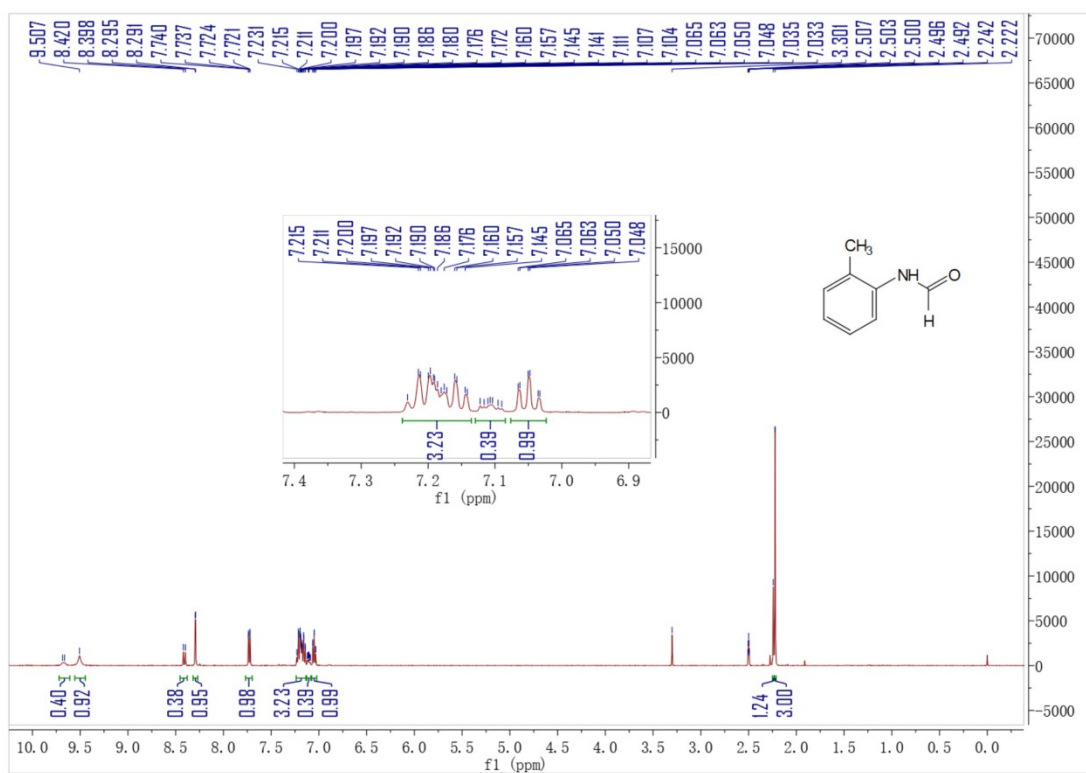

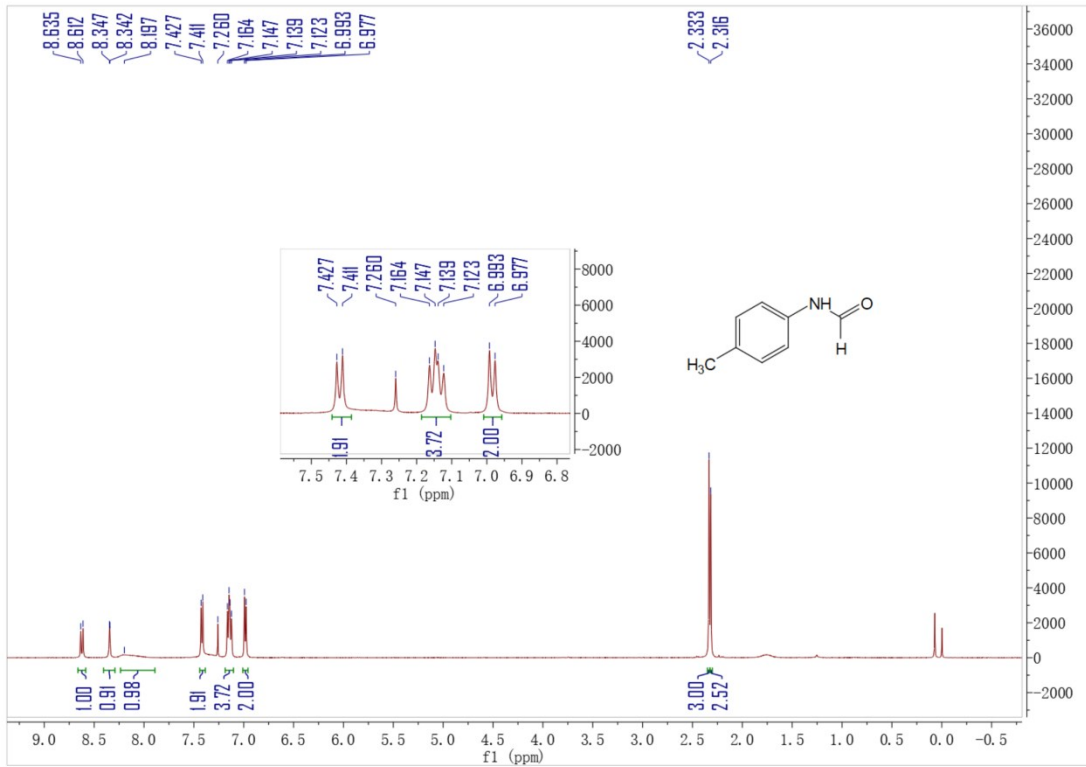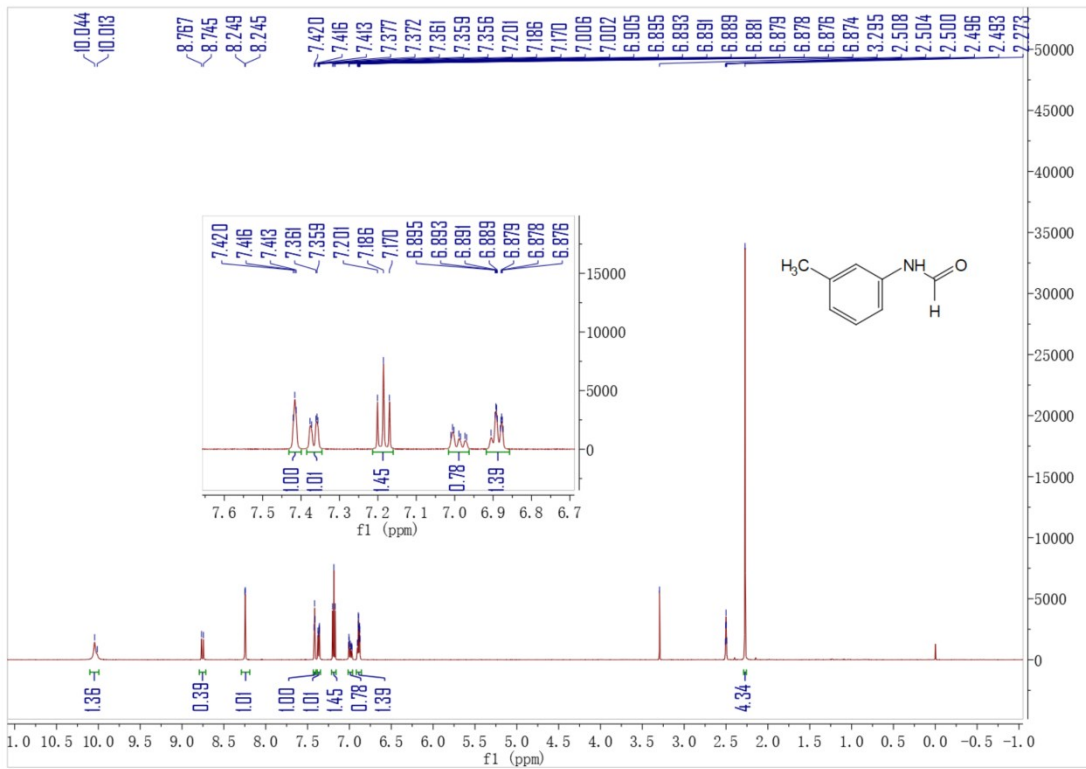

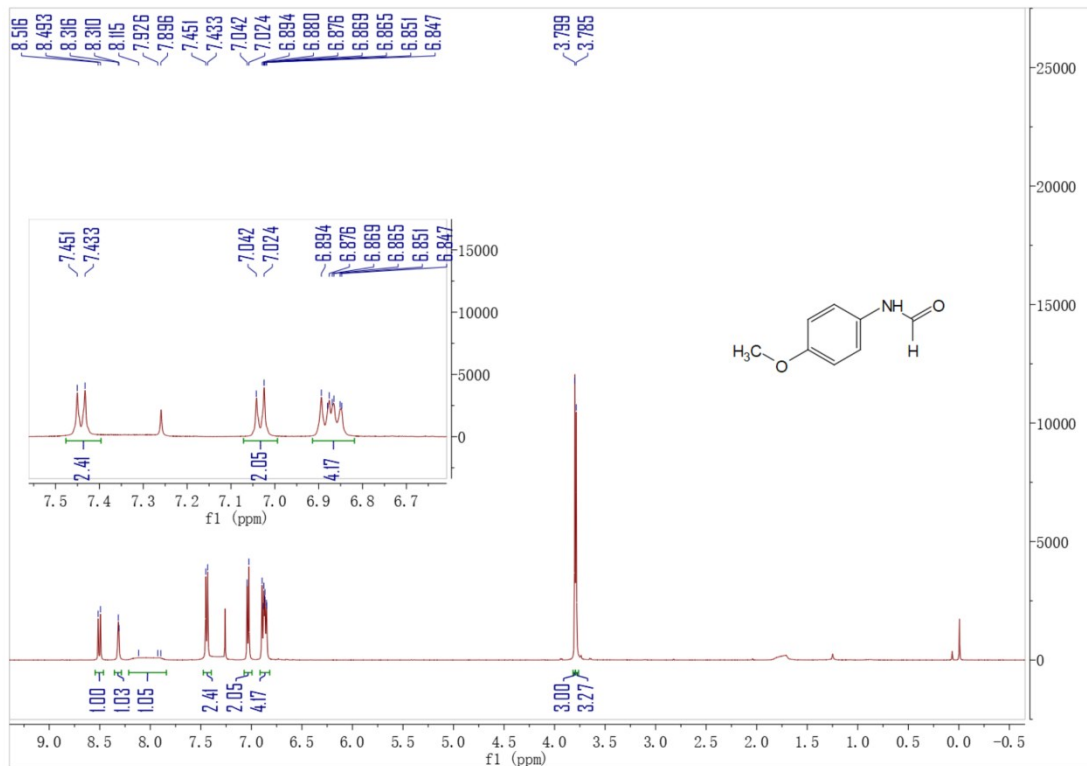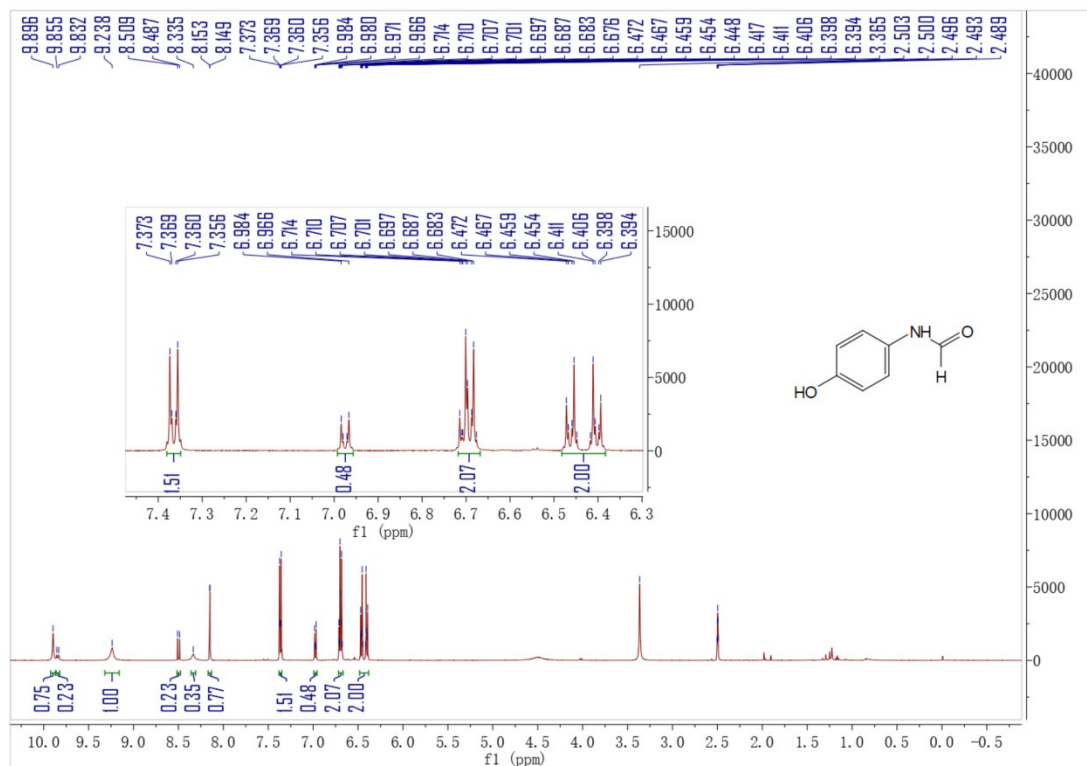

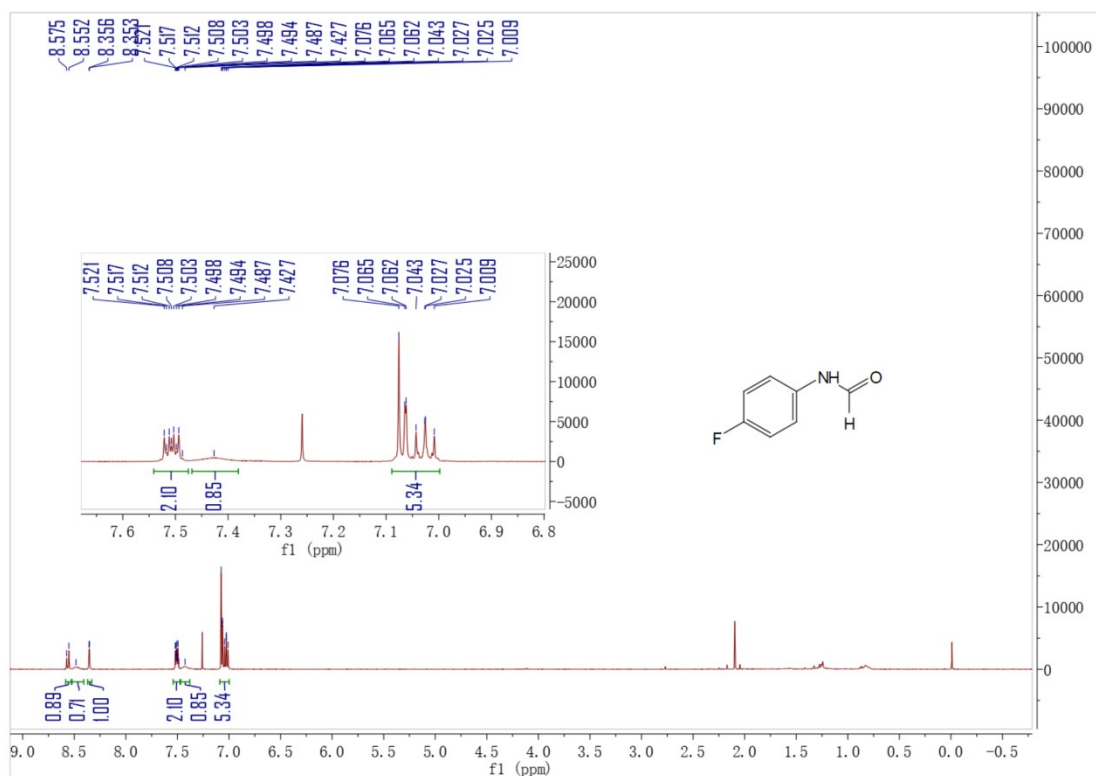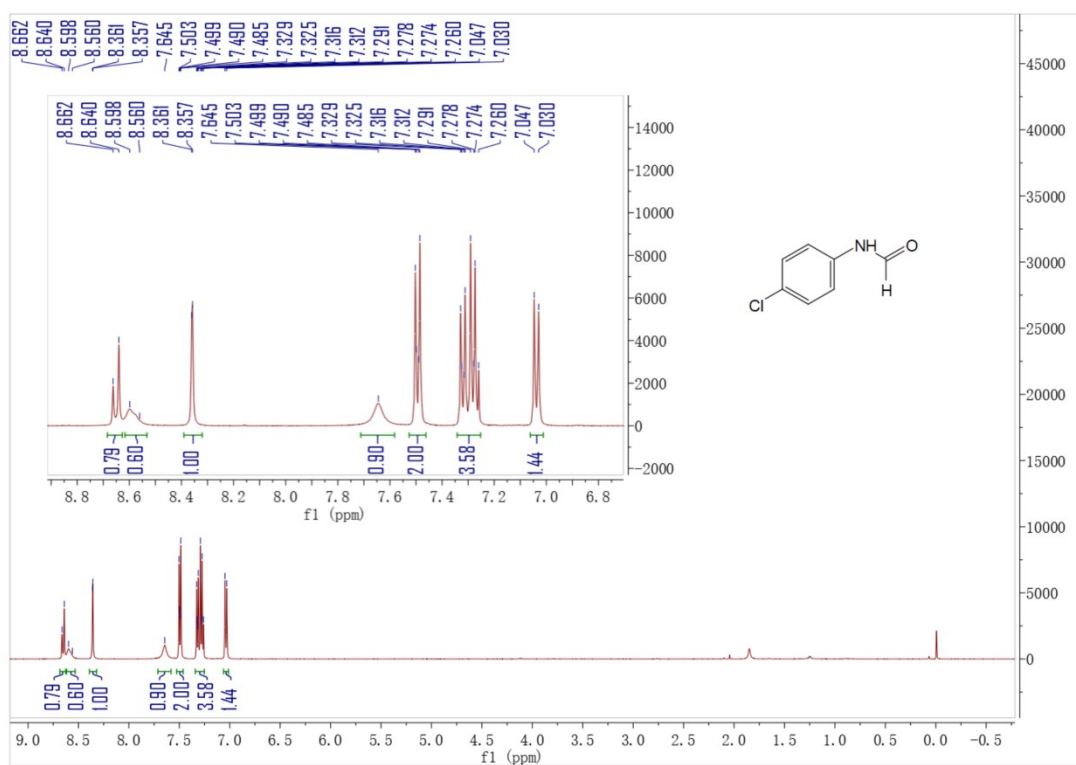

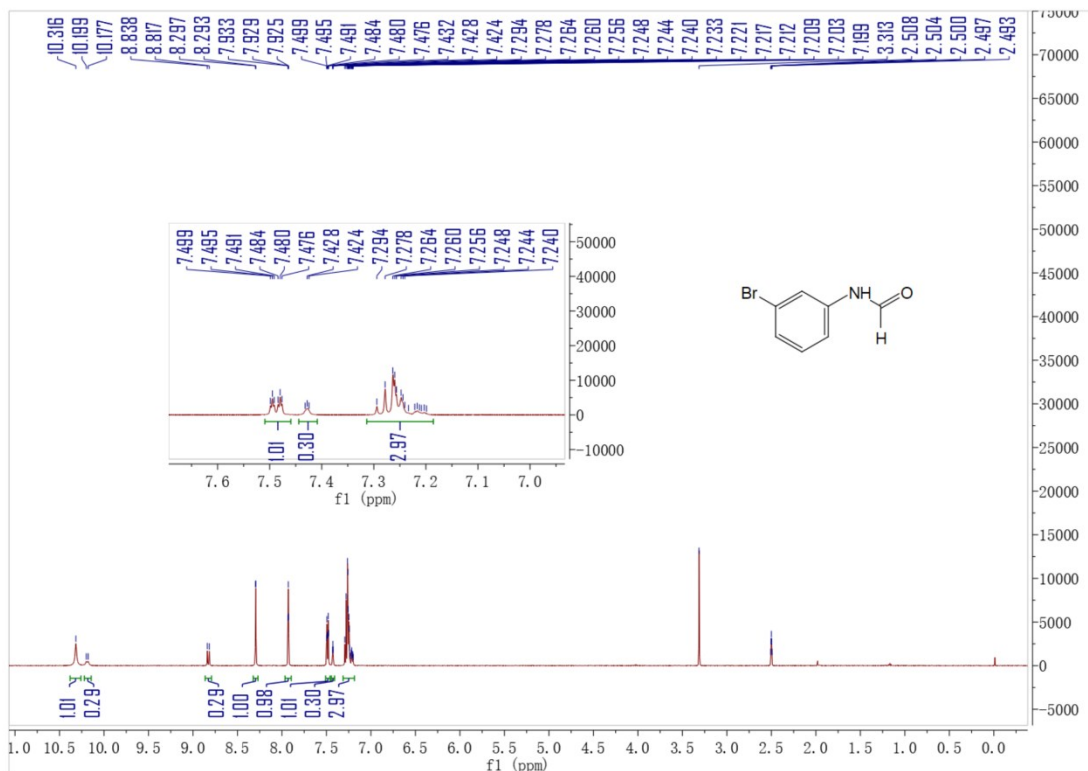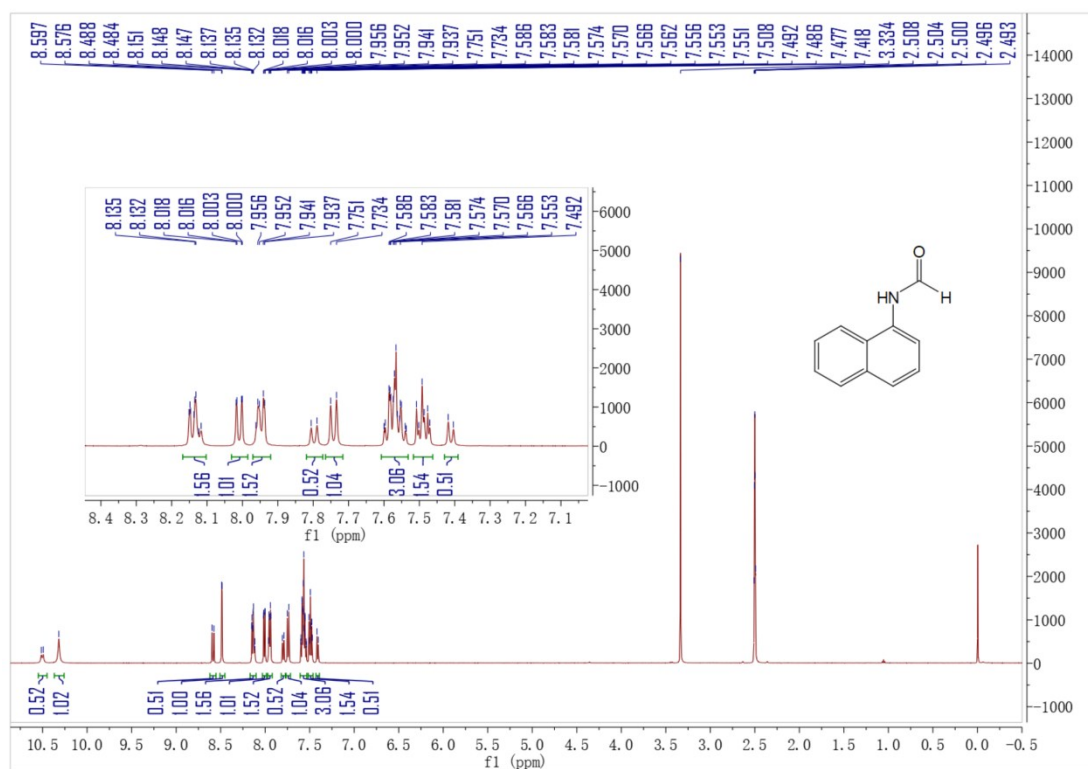

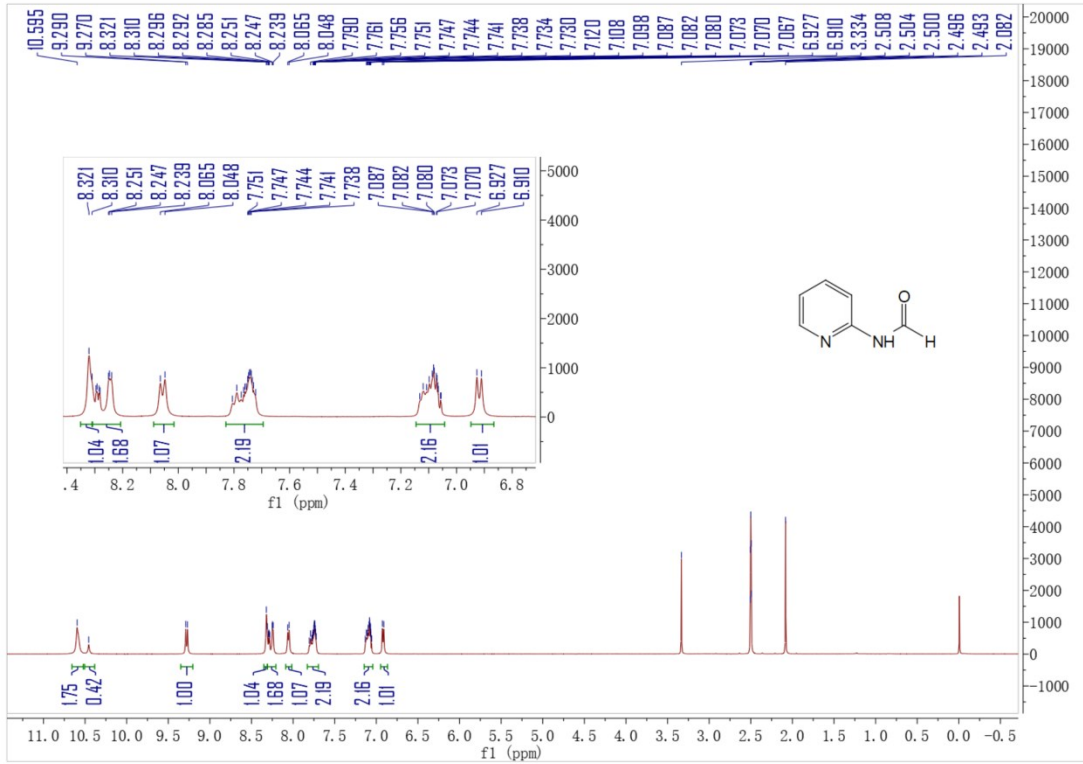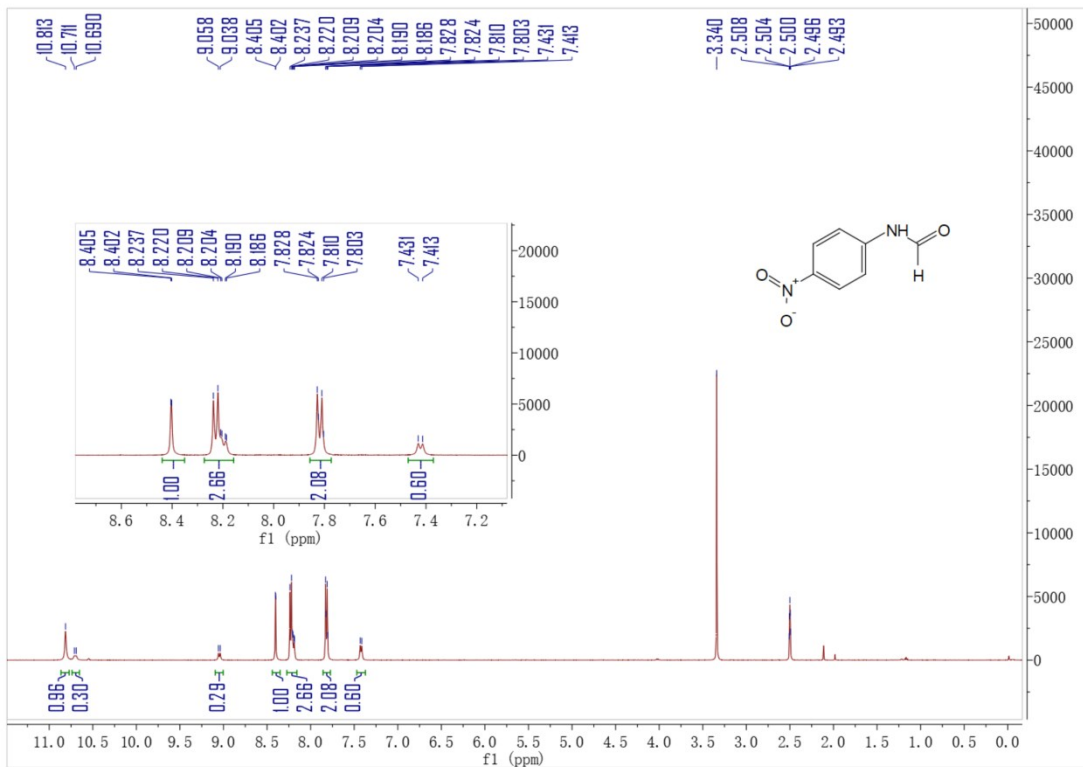

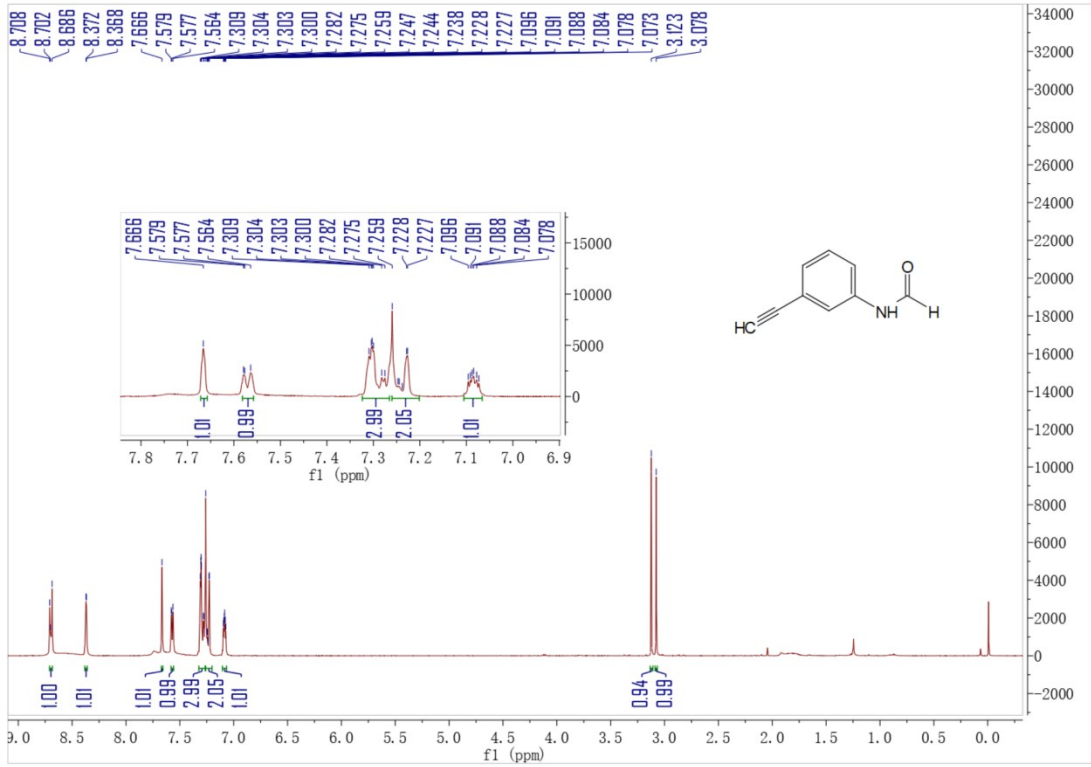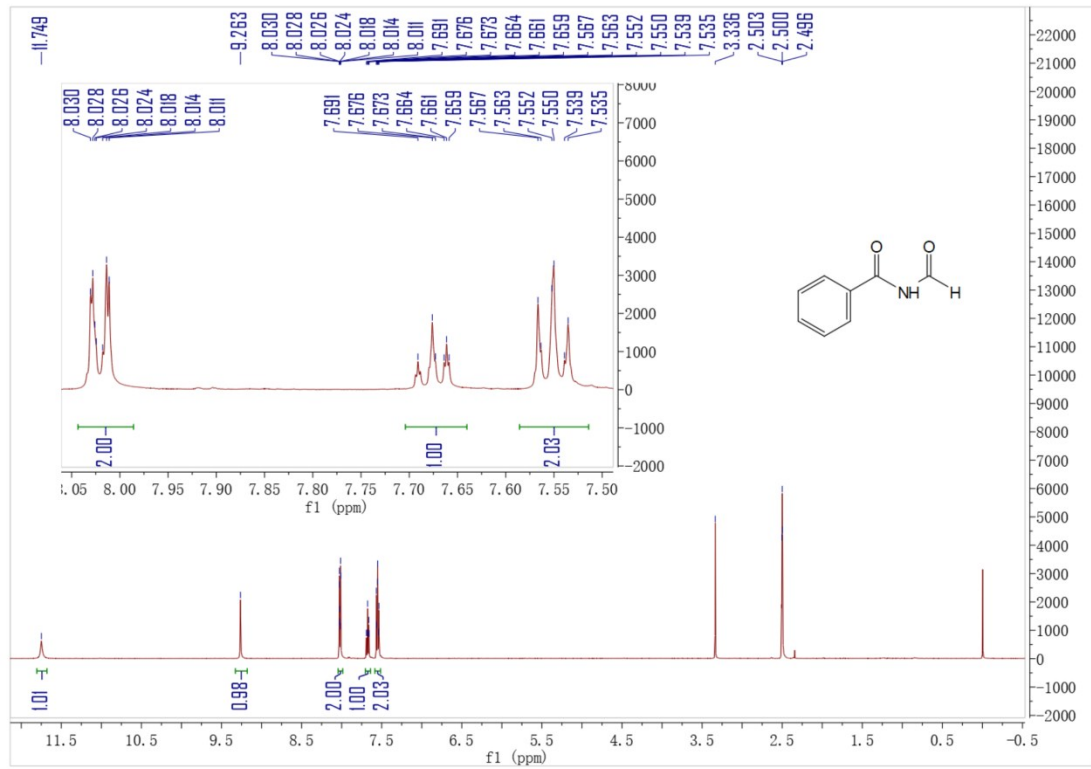

Supplement: c9gc01137d1.pdf [file c9gc01137d1.pdf]
